# Supplementary material for: Accurate in situ238U–234U–232Th–230Th analysis of silicate glasses and iron oxides by laser-ablation MC-ICP-MS
Source: Royal Society of Chemistry journal article supplement (doi:10.1039/b505020k), 2005-01-01
Supplement: esi.pdf [file esi.pdf]

This journal © The Royal Society of Chemistry 2005

Fig.S1

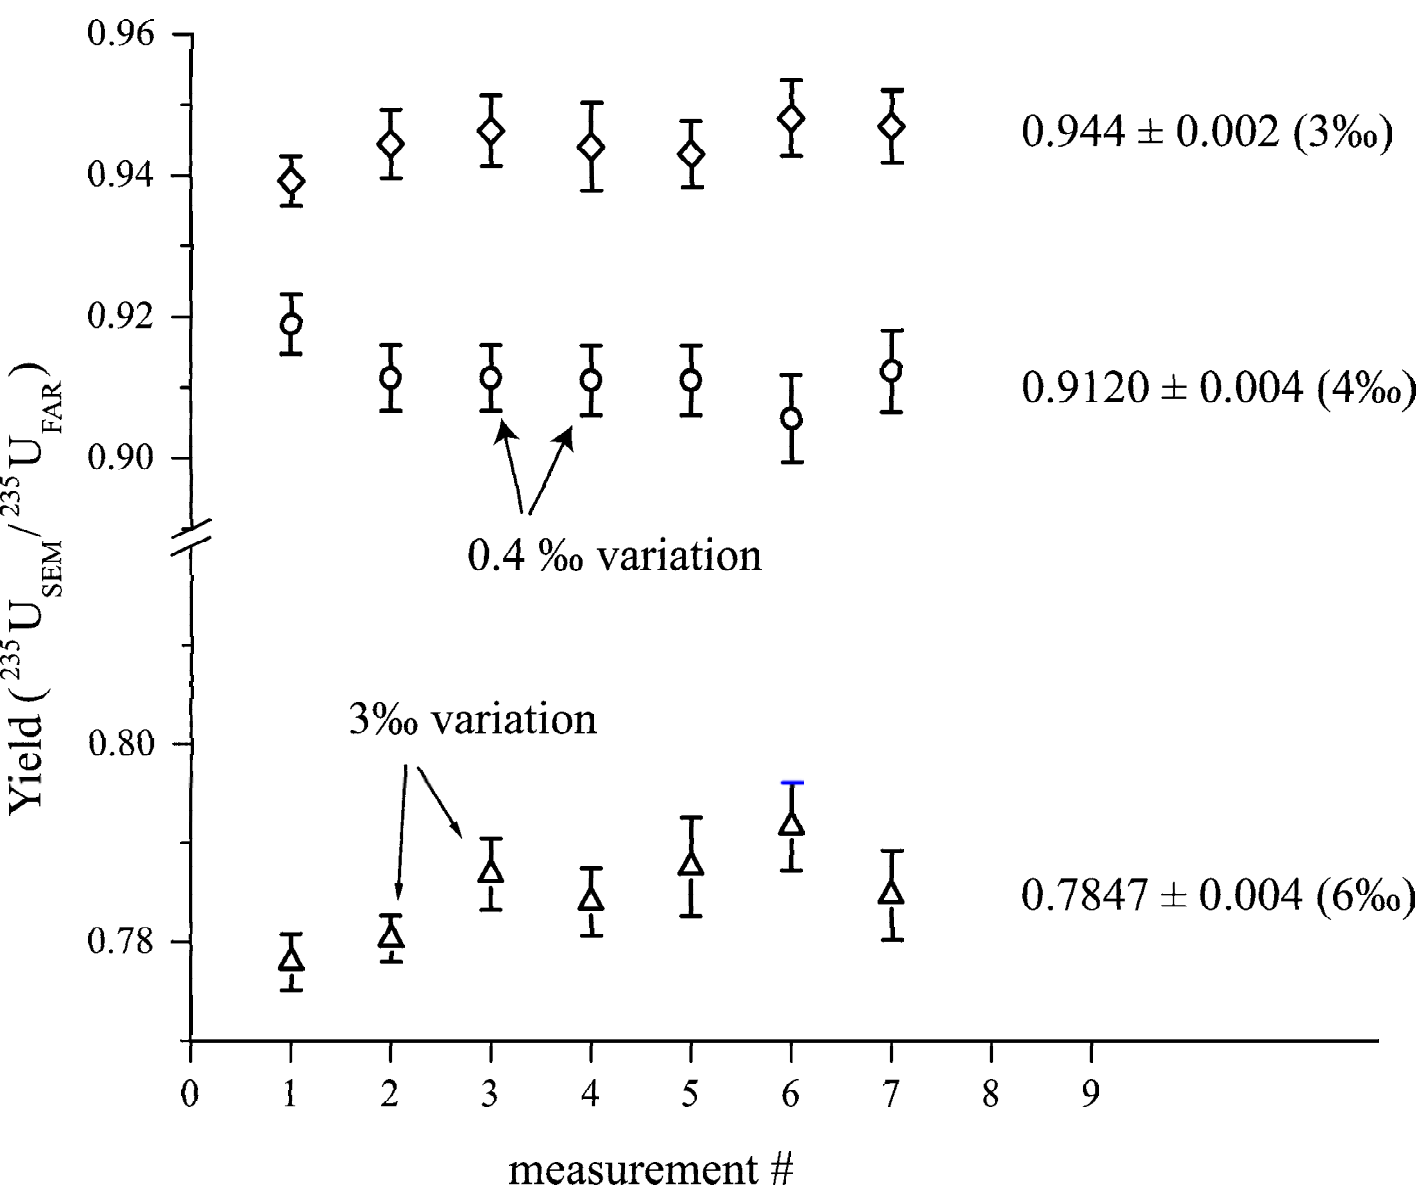

Stability of the calculated  $^{235}\text{U}$  SEM/FAR yield for three different sessions. Data corresponds to ion beam intensities ranging between 0.3 and 0.6 V. Arrows indicate maximum and minimum variability.
